# Supplementary material for: Intravesical Ty21a treatment of non-muscle invasive bladder cancer induces immune responses that correlate with safety and may be associated to therapy potential
Source: PubMed Central journal article supplement (PMC10729085; doi:10.1136/jitc-2023-008020), 2023-12-14
Supplement: jitc-2023-008020supp001.pdf [file jitc-2023-008020supp001.pdf]

**Supplementary Table 1: Patient characteristics of Ty21a-treated patients**

| Characteristics                           | Phase Ia (A)<br>1 x 10 <sup>8</sup> CFU <sup>a</sup> | Phase Ib (F)<br>5 x 10 <sup>8</sup> CFU <sup>a</sup> | Total      |
|-------------------------------------------|------------------------------------------------------|------------------------------------------------------|------------|
| Number of patients                        | 3                                                    | 10                                                   | 13         |
| Age, yr, median (IQR)                     | 76 (71-79)                                           | 74 (58-75)                                           | 74 (61-76) |
| <b>Sex, n</b>                             |                                                      |                                                      |            |
| Male                                      | 3                                                    | 9                                                    | 12         |
| Female                                    | 0                                                    | 1                                                    | 1          |
| <b>Number of tumors, n</b>                |                                                      |                                                      |            |
| Single                                    | 2                                                    | 4                                                    | 6          |
| 2-7                                       | 1                                                    | 6                                                    | 7          |
| > 8                                       | 0                                                    | 0                                                    | 0          |
| <b>Tumor diameter, n</b>                  |                                                      |                                                      |            |
| < 3 cm                                    | 3                                                    | 9                                                    | 12         |
| > 3 cm                                    | 0                                                    | 1                                                    | 1          |
| <b>Prior recurrence,</b>                  |                                                      |                                                      |            |
| Primary                                   | 2                                                    | 5                                                    | 7          |
| < 1 recurrence/yr                         | 1                                                    | 2                                                    | 3          |
| > 1 recurrence/yr                         | 0                                                    | 3                                                    | 3          |
| <b>Category and grade, n</b>              |                                                      |                                                      |            |
| Ta low grade                              | 3                                                    | 10                                                   | 13         |
| Ta high grade                             | 0                                                    | 0                                                    | 0          |
| T1 high grade                             | 0                                                    | 0                                                    | 0          |
| Any CIS positive                          | 0                                                    | 0                                                    | 0          |
| <b>Risk of recurrence<sup>b</sup>, n</b>  |                                                      |                                                      |            |
| Low                                       | 1                                                    | 1                                                    | 2          |
| Intermediate                              | 2                                                    | 9                                                    | 11         |
| High                                      | 0                                                    | 0                                                    | 0          |
| <b>Risk of progression<sup>b</sup>, n</b> |                                                      |                                                      |            |
| Low                                       | 1                                                    | 1                                                    | 2          |
| Intermediate                              | 2                                                    | 9                                                    | 11         |
| High                                      | 0                                                    | 0                                                    | 0          |

<sup>a</sup> Data from Lucca et al. Eur Urol Open Sci. 2022 Oct 3;45:55-58.

<sup>b</sup> according to EORTC score

CIS = Carcinoma In Situ; IQR: Interquartile Range
