# Supplementary material for: Intravesical Ty21a treatment of non-muscle invasive bladder cancer induces immune responses that correlate with safety and may be associated to therapy potential
Source: PubMed Central journal article supplement (PMC10729085; doi:10.1136/jitc-2023-008020), 2023-12-14
Supplement: jitc-2023-008020supp002.pdf [file jitc-2023-008020supp002.pdf]

**Supplementary Table 2: Characteristics of patients treated by BCG**

| <b>Characteristics</b>                    | <b>BCG Tice</b> |
|-------------------------------------------|-----------------|
| Number of patients                        | 12              |
| Age, yr, median (IQR)                     | 66 (53-72)      |
| <b>Sex, n</b>                             |                 |
| Male                                      | 12              |
| Female                                    | 0               |
| <b>Number of tumors, n</b>                |                 |
| 1                                         | 1               |
| 2-7                                       | 11              |
| > 8                                       | 0               |
| <b>Tumor diameter, n</b>                  |                 |
| < 3 cm                                    | 9               |
| > 3 cm                                    | 3               |
| <b>Prior recurrence, n</b>                |                 |
| Primary                                   | 10              |
| < 1 recurrence/yr                         | 1               |
| > 1 recurrence/yr                         | 1               |
| <b>Stage and grade, n</b>                 |                 |
| Ta low grade                              | 1               |
| Ta high grade                             | 3               |
| T1 high grade                             | 8               |
| Any CIS positive                          | 6               |
| <b>Risk of recurrence<sup>a</sup>, n</b>  |                 |
| Low                                       | 0               |
| Intermediate                              | 11              |
| High                                      | 1               |
| <b>Risk of progression<sup>a</sup>, n</b> |                 |
| Low                                       | 0               |
| Intermediate                              | 0               |
| High                                      | 12              |

CIS = Carcinoma In Situ; IQR = Interquartile Range

<sup>a</sup> according to EORTC score
